# Supplementary material for: Genome-wide Identification of the Aconitase Gene Family in Tomato (<em>Solanum lycopersicum</em>) and CRISPR-based Functional Characterization of <em>SlACO2</em> on Male-sterility
Source: Preprints.org preprint supplement (doi:10.20944/preprints202211.0173.v1), 2022-11-09
Supplement: Supplementary file 2 [file Table S2.xlsx]

## Sheet: Predicted functional Parners
Table S2. Predicted functional partners of SlACOs
Gene ID or Name	Description	Score
petA	Apocytochrome f; Cytochrome f; Component of the cytochrome b6-f complex, which mediates electron transfer between photosystem II (PSII) and photosystem I (PSI), cyclic electron flow around PSI, and state transitions	0.999
petG	Cytochrome b6-f complex subunit 5; Component of the cytochrome b6-f complex, which mediates electron transfer between photosystem II (PSII) and photosystem I (PSI), cyclic electron flow around PSI, and state transitions. PetG is required for either the stability or assembly of the cytochrome b6-f complex	0.999
Solyc01g073740.2.1	Citrate synthase, mitochondrial; Belongs to the citrate synthase family	0.999
Solyc05g009030.2.1	3-isopropylmalate dehydrogenase, chloroplastic; 3-isopropylmalate dehydrogenase; Catalyzes the oxidation of 3-carboxy-2-hydroxy-4- methylpentanoate (3-isopropylmalate) to 3-carboxy-4-methyl-2- oxopentanoate. The product decarboxylates to 4-methyl-2 oxopentanoate	0.999
Solyc07g055840.2.1	annotation not available	0.999
Solyc12g005630.1.1	Cytochrome b6-f complex iron-sulfur subunit, chloroplastic; Cytochrome b6-f complex iron-sulfur subunit; Photosynthetic electron transfer C	0.999
Solyc12g011000.1.1	annotation not available	0.999
Solyc04g049260.1.1	annotation not available	0.998
rps16	30S ribosomal protein S16, chloroplastic; 30S ribosomal protein S16	0.998
Solyc08g006840.2.1	annotation not available	0.998
