# Supplementary material for: Genome-wide Identification of the Aconitase Gene Family in Tomato (<em>Solanum lycopersicum</em>) and CRISPR-based Functional Characterization of <em>SlACO2</em> on Male-sterility
Source: Preprints.org preprint supplement (doi:10.20944/preprints202211.0173.v1), 2022-11-09
Supplement: Supplementary file 3 [file Table S3.xlsx]

## Sheet: Sheet1
Table S3. Changes in pollen viability in WT and SlACO2 mutant lines
Lines	Pollen activity
	active %	semi-active %	sterile %
WT	85.10	10.63	4.25
Line 3	4	12	84
Line 6	2	11	87
